# Supplementary material for: Template electrosynthesis of tailored-made helical nanoswimmers
Source: Royal Society of Chemistry journal article supplement (doi:10.1039/c3nr04760a), 2013-10-07
Supplement: c3nr04760a.pdf [file c3nr04760a.pdf]

## Supplementary information

### Template Electrosynthesis of Tailored-Made Helical Nanoswimmers

*Jinxing Li, Sirilak Sattayasamitsathit, Renfeng Dong, Wei Gao, Ryan Tam, Xiaomiao Feng, Stephen Ai, Joseph Wang\**

Department of Nanoengineering, University of California, San Diego, La Jolla, California 92093, United States.

\*Corresponding Author: [josephwang@ucsd.edu](mailto:josephwang@ucsd.edu)

#### 1. Supplementary Figures

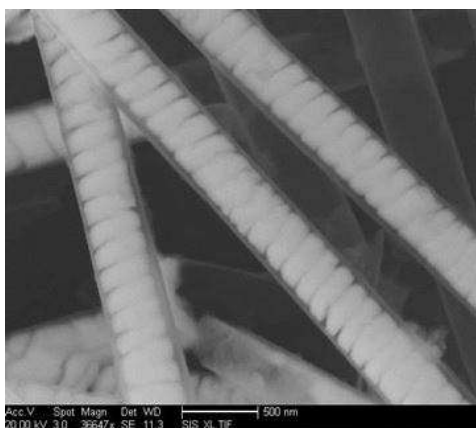

**Fig. S1** SEM image of 400 nm nanosprings encapsulated within Al<sub>2</sub>O<sub>3</sub> nanotubes after the dissolution of the PC membranes.

#### 2. Supplementary Videos

SI 1. The frequency-dependent transition motion behavior of a 400 nm diameter helical nanoswimmer upon increasing the magnetic frequency from 10 to 100 Hz.

SI 2. Movement of a helical nanoswimmer (3  $\mu\text{m}$  long; 400 nm diameter) over the 3 sec period at a magnetic frequency of 150 Hz.

SI 3. Movements of helical nanoswimmers with different diameters (100, 200 and 400 nm) over the 2 sec period at a magnetic frequency of 120 Hz.
